# Supplementary material for: The CHORD protein CHP-1 regulates EGF receptor trafficking and signaling in C. elegans and in human cells
Source: eLife. 2020 Feb 13;9:e50986. doi: 10.7554/eLife.50986 (PMC7062474; doi:10.7554/eLife.50986)
Supplement: Supplementary file 1. [file elife-50986-supp1.xlsx]

## Sheet: Sheet1
Strain	Genotype	Reference
AH1779	zhIs38[let-23::gfp;unc-119(+)]	Haag et al., 2014
SJ4005	zcIs4[hsp-4::gfp]	Calfon et al., 2002
AH3131	chp-1(tm2277)/hT2	Mitani knockout consortium
AH3067	chp-1(tm2277)/hT2 I; zhIs38[let-23::gfp; unc-119(+)]	this study
AH3080	chp-1(tm2277)/hT2; let-60(n1046)	this study
AH3081	chp-1(tm2277)/hT2; qyIs43 [pat-3::gfp, ina-1, unc-119(+)]	this study
AH3098	chp-1(tm2277)/hT2 ; lin-2(n397)	this study
AH3388	chp-1(tm2277)/hT2; let-23(sy1)	this study
AH3412	chp-1(tm2277)/hT2; zhIs4[lip-1::nls::gfp::lacZ]	this study
AH4418	chp-1(tm2277)/hT2; lin-3(e1417) zhIs38[let-23::gfp;unc-119(+)]	this study
AH4483	chp-1(tm2277)/hT2; syIs75[lin-18::gfp + unc-119(+)]	this study
AH4487	chp-1(tm2277)/hT2; zhIs38[let-23::gfp; unc-119(+)]; lin-2(n397)	this study
AH4510	chp-1(tm2277)/hT2; unc-119(ed4) III; qyIs176[zmp-1::mCherry::moeABD + unc-119(+)]; zhIs38[let- 23::gfp;unc-119+]	this study
AH4609	zhIs38[let-23::gfp, unc-119+]; zhEx558[Pegl-17::cas-9; SG#1 chp-1; SG#2 chp-1]	this study
AH4647	zhIs38[let-23::gfp; unc-119(+)]; daf-21(p673)	this study
AH4689	chp-1(tm2277)/hT2 I; zhIs104[Pdlg-1::aman-2::mcherry::unc-54 3' UTR, unc- 119(+)]; zhIs38[let-23::gfp;unc-119+]	this study
AH4709	chp-1(tm2277)/hT2 I; zhIs105 [Pdlg-1::mcherry::C34B2.10(SP12)::unc-54 3' UTR, unc-119(+)]; unc-119(ed3); zhIs38[let-23::gfp;unc-119+]	this study
AH4756	chp-1(tm2277)/hT2; zcIs4[hsp-4::gfp]	this study
GS3201	arIs82 [lin-12::gfp; unc-4(+); egl-17p::LacZ]	Shaye and Greenwald, 2002
AH3132	chp-1(tm2277)/hT2; arIs92[egl-17::cfp; tax-3::gfp]	this study
AH5867	hsp-90(ok1333)/nT1 ; zhIs35[let23::gfp]	this study
AH5866	enpl-1(ok1964)/nT1 ; zhIs35[let23::gfp]	this study
AH2417	rrf-3(pk1426)II;unc-119(ed4)III;zhIs038[let-23::gfp, unc-119(+)] IV;rde-1(ne219)V; zhEx418[lin-31::rde-1genomic; myo2-mcherry]	Haag et al., 2014
