# Supplementary material for: The CHORD protein CHP-1 regulates EGF receptor trafficking and signaling in C. elegans and in human cells
Source: eLife. 2020 Feb 13;9:e50986. doi: 10.7554/eLife.50986 (PMC7062474; doi:10.7554/eLife.50986)
Supplement: Supplementary file 2. [file elife-50986-supp2.xlsx]

## Sheet: Sheet1
Primer Name	Sequence (5’-3’)
OAHE8	TTA TTT CGT CTT CTT TGT CTC C
OAHE19	CAC CGA AGG AAG GAA GCA TGG TCT CAA AGG GTG AAG AAG ATA AC
OAHE20	CAT TCC GTC AGC GGC CGC CTT ATA CAA TTC ATC CAT GCC ACC
OAHE21	GCG GCC GCT GAC GGA ATG ATT GCA ATG CTC CC
OAHE22	GGA GAC AAA GAA GAC GAA ATA AAG AAT TCC AAC TGA GCG CCG GTC GC
OEH152	CAC CGA AGG AAG GAA GCA TGG GAA AAC GCA ATT TCT ATA TTA TC
OEH153	GCT TCC TTC CTT CGG TGA GGC G
OEH154	CGG GAT CCC CGG GAT TGG CC
OEH156	GAT GAA TTG TAT AAG TAG AGA ATT CCA ACT GAG CGC CGG TCG C
OEH155	CAA TCC CGG GGA TCC CGT TCT TCA TCA AAA TCT ACC G
OEH157	CTA CTT ATA CAA TTC ATC CAT GC
OEH158	GGG GCG AAA ACT CTC AAG GAT CT
OEH159	CTT GAG AGT TTT CGC CCC GAA GAA CGT TTT CCA ATG ATG AGC AC
