# Supplementary figures and images for: The CHORD protein CHP-1 regulates EGF receptor trafficking and signaling in C. elegans and in human cells
Source: eLife journal article supplement (doi:10.7554/elife.50986), 2020-02-13

Figure 3-figure supplement 2

DMSO

tunicamycin

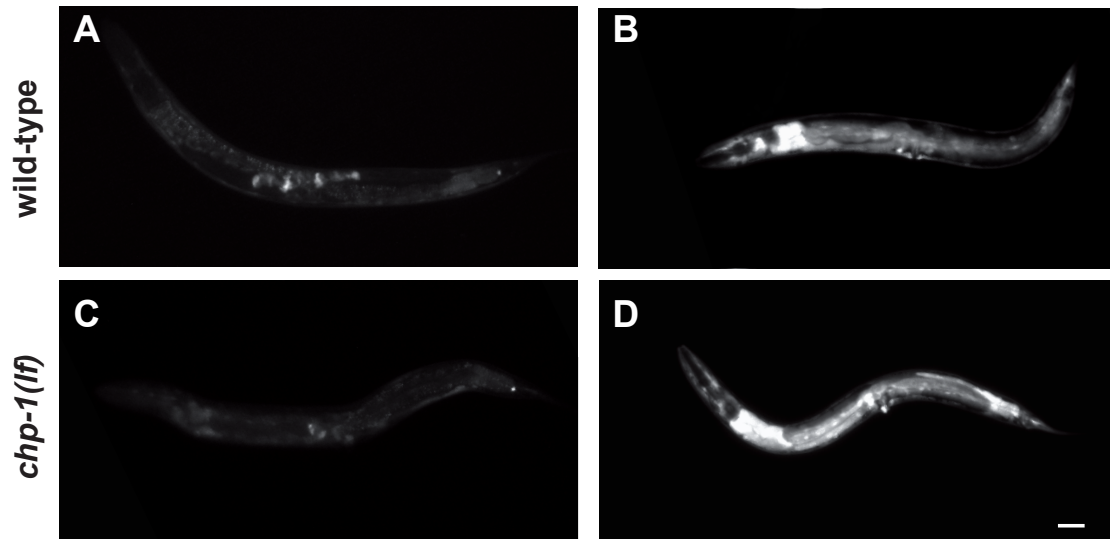

**E**

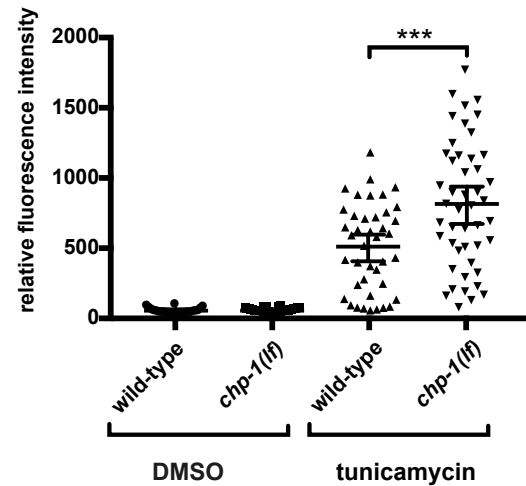

Supplement: supp [file elife-50986-supp-v1.zip]

Figure 3-figure supplement 1

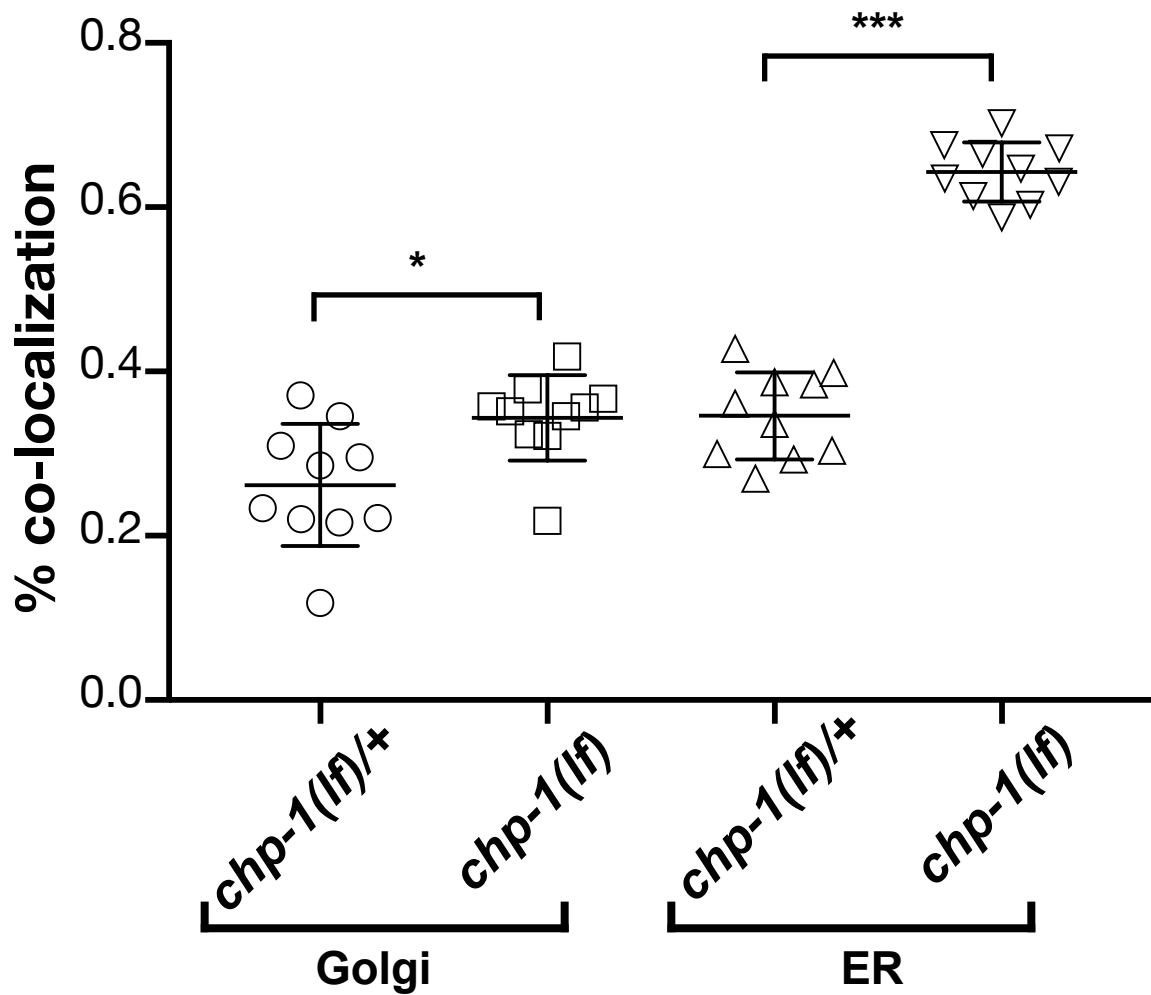

Supplement: supp [file elife-50986-supp-v1.zip]

Figure 1-figure supplement 1

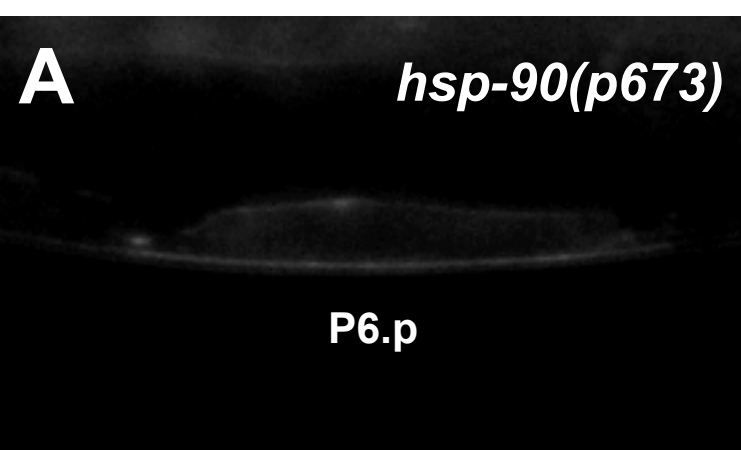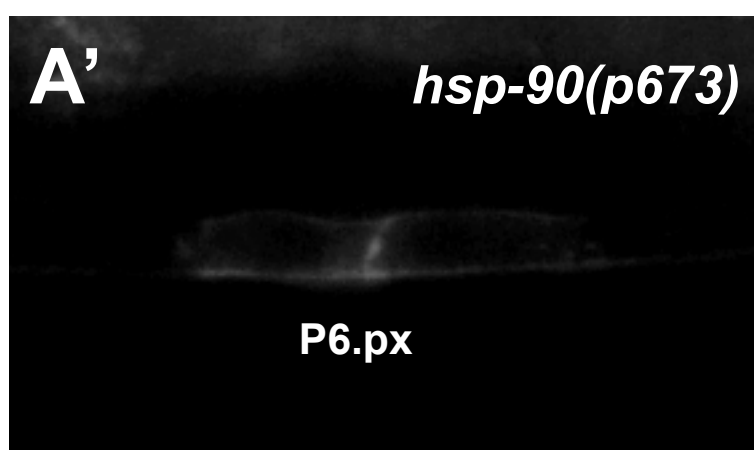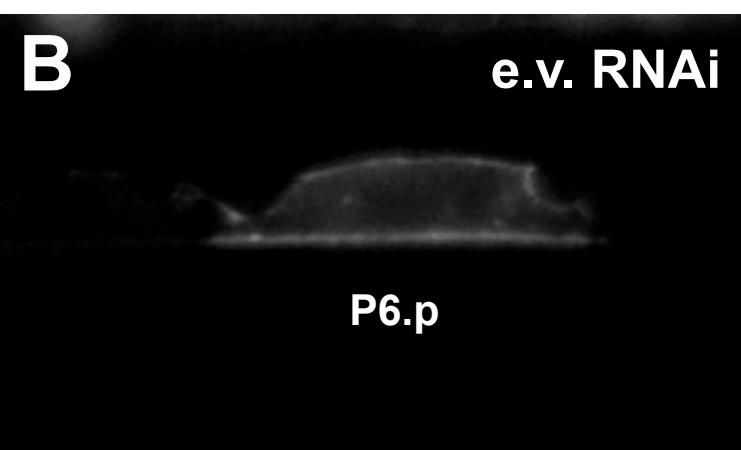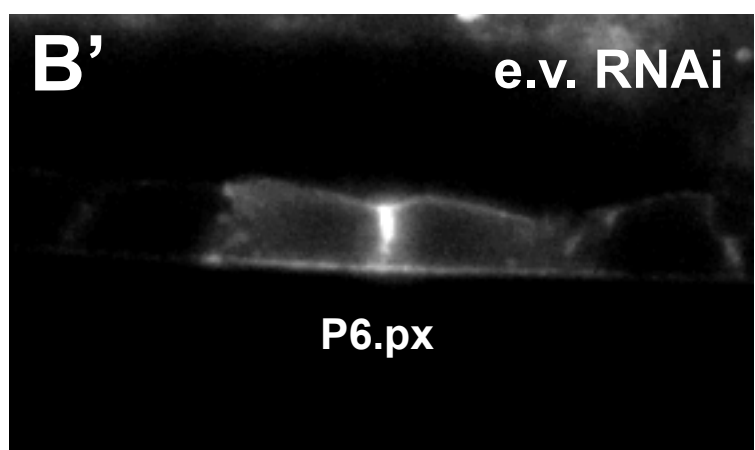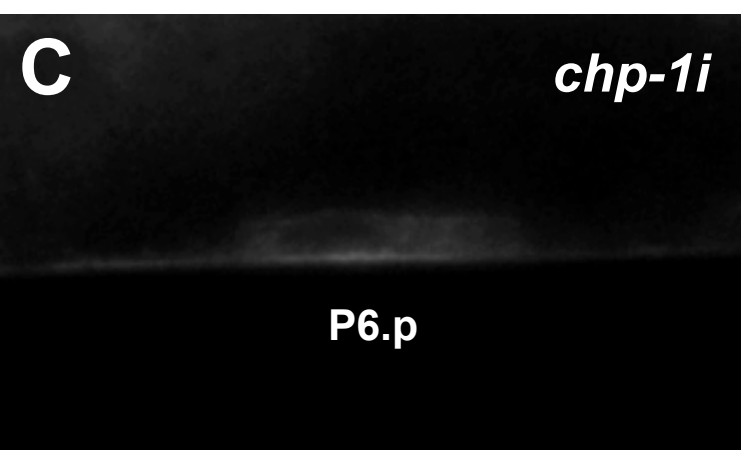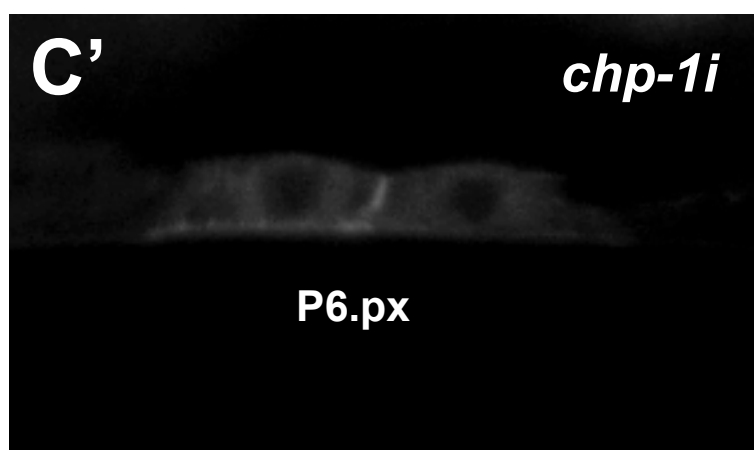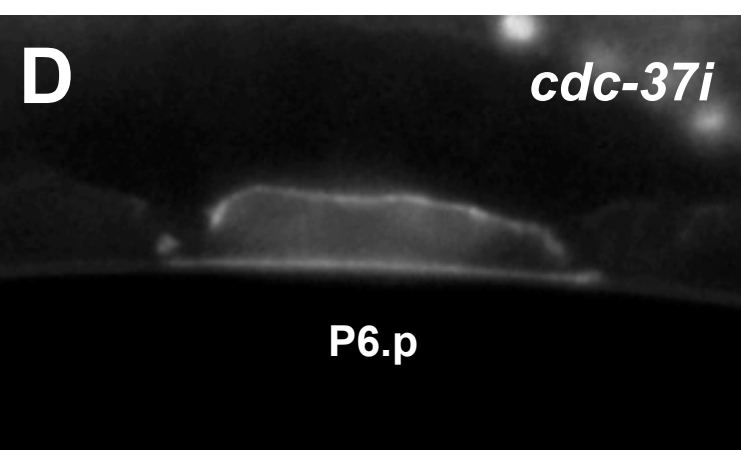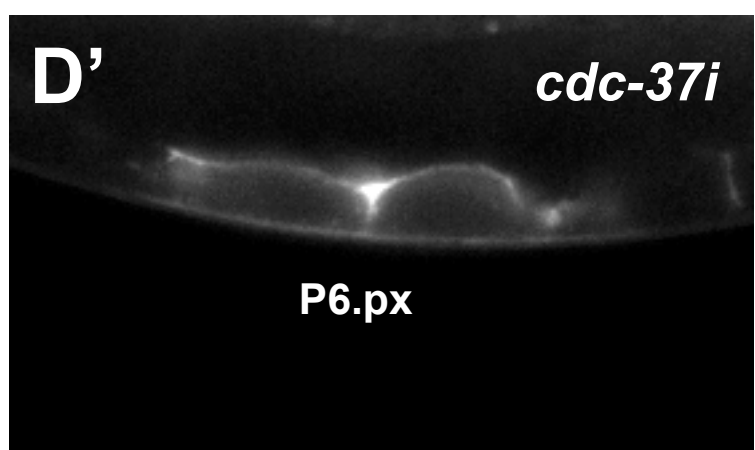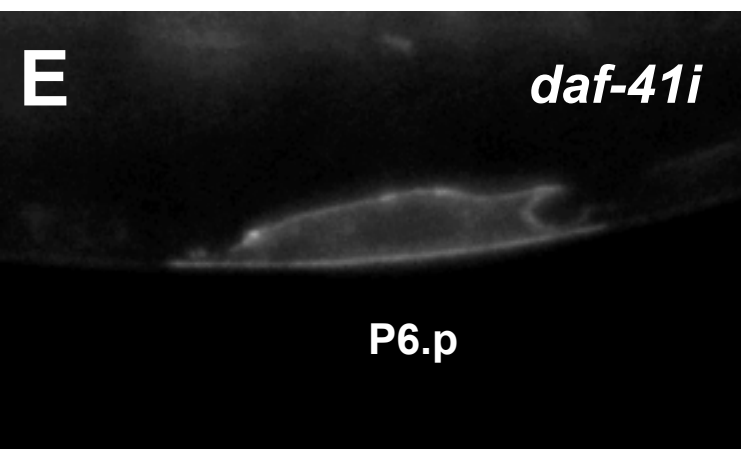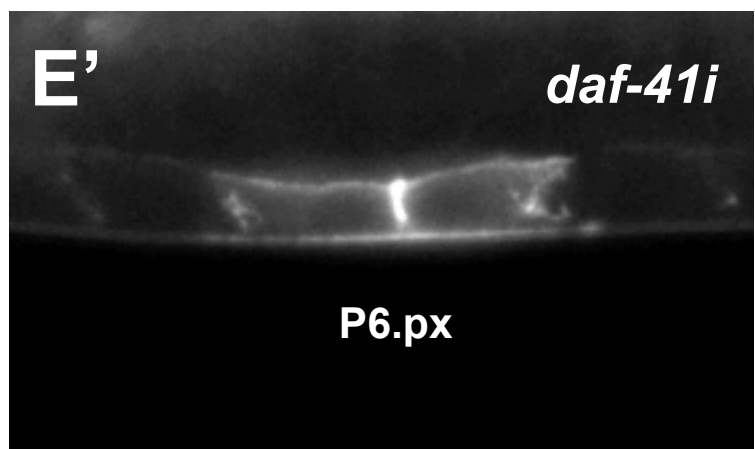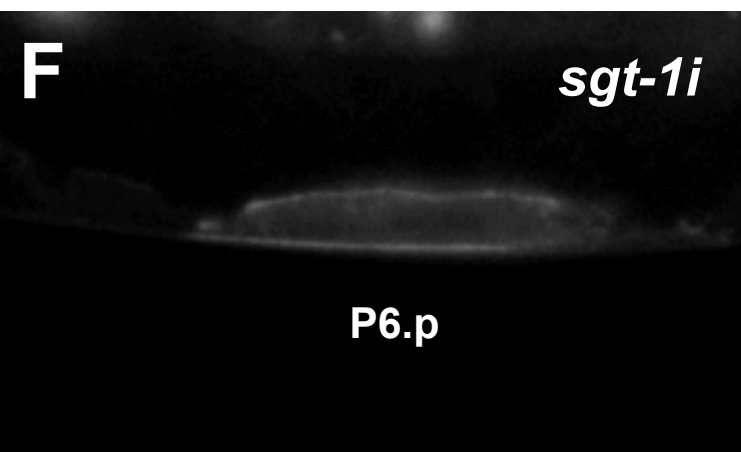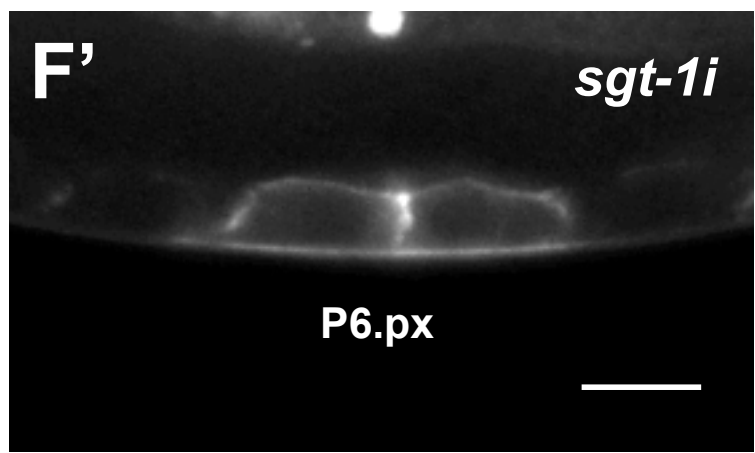

Supplement: supp [file elife-50986-supp-v1.zip]
